# Supplementary material for: A label-free and immobilization-free approach for constructing photoelectrochemical nucleic acid sensors utilizing DNA–silver nanoparticle affinity interactions
Source: Royal Society of Chemistry journal article supplement (doi:10.1039/d4an00098f), 2024-01-01
Supplement: d4an00098f1.pdf [file d4an00098f1.pdf]

## Electronic Supplementary information

### A Label-Free and Immobilization-Free Approach for Constructing Photoelectrochemical Nucleic Acid Sensors Utilizing DNA-Silver Nanoparticle Affinity Interactions

Jing Yi, Jiayao Dong, Yawen Zheng, Liu Liu, Ji Zhu, Hongwu Tang\*

Key Laboratory of Analytical Chemistry for Biology and Medicine (Ministry of Education),  
College of Chemistry and Molecular Sciences, Wuhan University, Wuhan, 430072, China.

\*Corresponding author. E-mail address: [hwtang@whu.edu.cn](mailto:hwtang@whu.edu.cn).

#### Materials and Instrumentations

Lbcas12a (>95%) was purchased from Guangzhou Bio-lifesci Co. Ltd. (China). Zn (NO<sub>3</sub>)<sub>2</sub>·6H<sub>2</sub>O (99%), Na<sub>2</sub>S(AR), polyvinylpyrrolidone (MW ~ 4000, K30), ethylenediamine (98%) were bought by Aladdin Industrial Inc. (China). NaCl (99.5%), CdCl<sub>2</sub>·2.5(H<sub>2</sub>O) (99%), NH<sub>3</sub>·H<sub>2</sub>O (28%), NaBH<sub>4</sub>(AR), AgNO<sub>3</sub>(99.8%) were provided from Sinopharm Chemical Reagent Co. (China). 10\*CRISPR Reaction buffer was prepared by mixing the stock solutions (10 mM Tris-HCl, 100 mM NaCl, 100 mM MgCl<sub>2</sub>, 1 mg/mL BSA, pH=7.9). All reagents were used as received and buffer solutions were prepared throughout from deionized water (resistivity ≥18.25 MΩ·cm). Nucleic acid sequences (DNA and RNA) synthesized and purified with HPLC by Shanghai Sangon Biotech. (China) were listed in Table S1.

Electrochemical measurements were conducted with an electrochemical workstation (DH7000, Donghua Analytical Instruments Co., Ltd, China) in a standard three-electrode system. UV-visible absorption spectra, UV-visible diffuse reflectance spectra and transmittance spectra were determined on a Shimadzu UV-3600 spectrophotometer (Japan). The morphology characterization was tested by field-emission scanning electron microscope (FESEM, Zeiss SIGMA, Carl Zeiss) and Transmission electron microscopy (TEM, JEM-2100, JEOL). X-ray diffraction patterns ranging from 20° to 80° were taken on an X-ray diffractometer (PANalytical, Netherlands). Fourier transform infrared spectra were obtained on a FT-IR spectrometer (NICOLET 5700, USA) by depositing the solid samples on KBr tablets. Fluorescence spectra were recorded on a Hitachi F-4700 spectrophotometer (Japan). Polyacrylamide gel electrophoresis was conducted on a voltage-type electrophoresis imaging apparatus (JY04S-3C, Beijing Junyi Co, China).



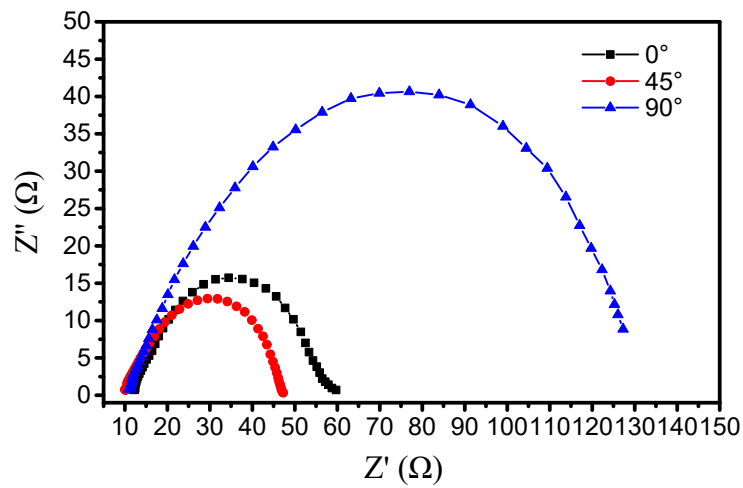

**Figure. S2** EIS analysis of ITO-ZnO in the dark.

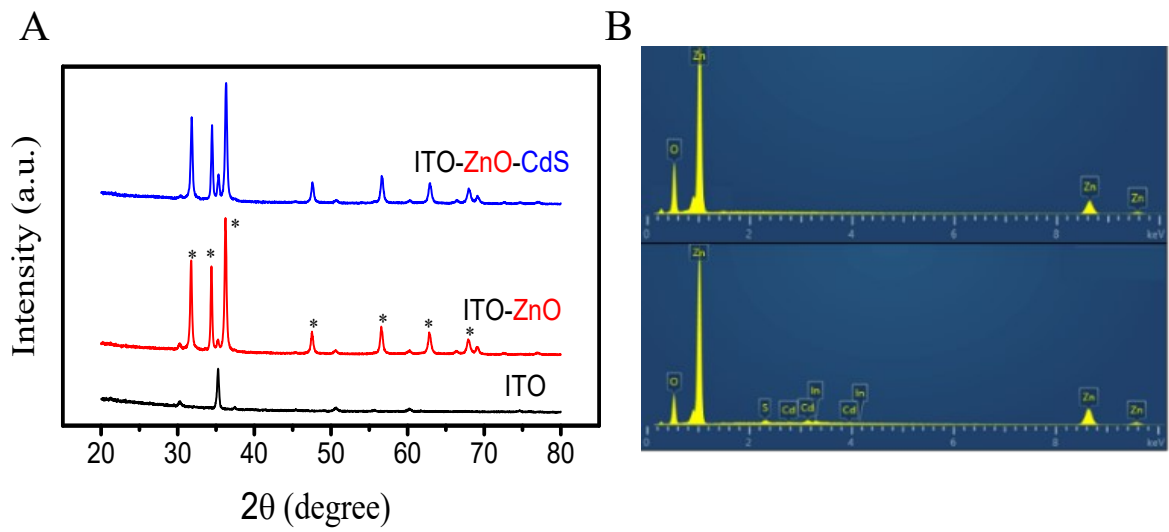

**Figure. S3** (A) XRD spectra patterns of bare ITO, ITO-ZnO, and ITO-ZnO-CdS. (B) EDX analyses of ITO-ZnO and ITO-ZnO-CdS formed at a 45° immersion angle.

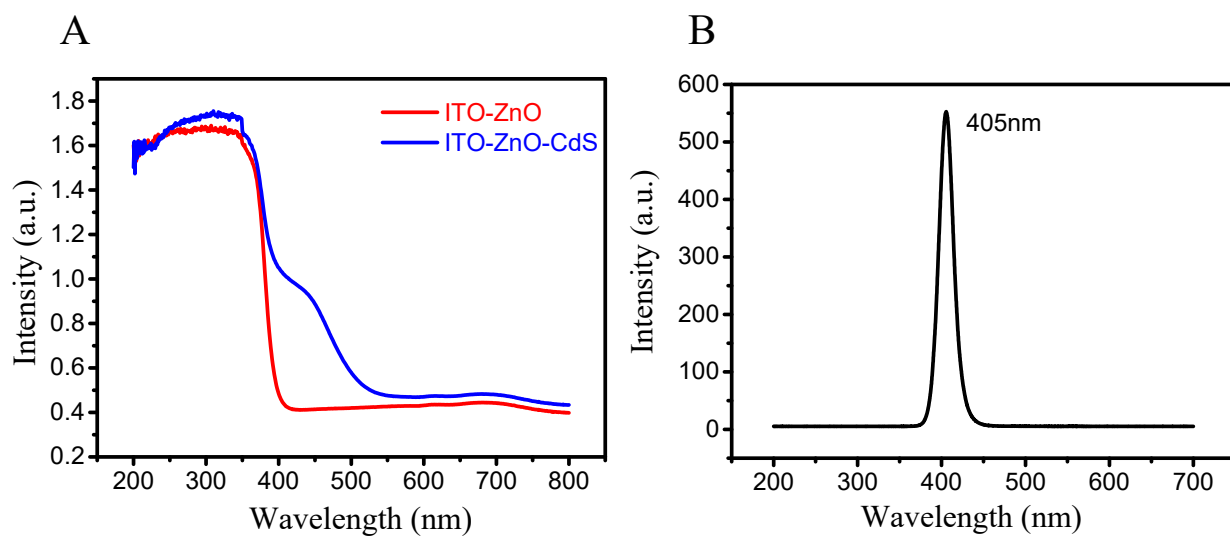

**Figure. S4** (A) UV-visible diffuse reflectance spectra of ITO-ZnO and ITO-ZnO-CdS formed at a 45° immersion angle. (B) Emission spectrum of the LED light source used in this work.

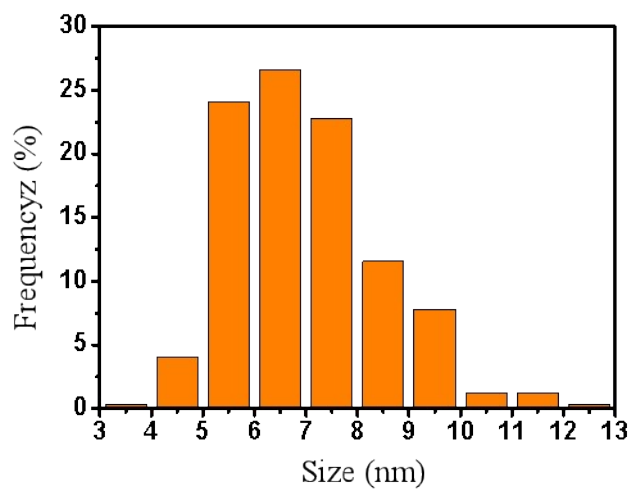

**Figure. S5** Size statistic data of AgNPs.

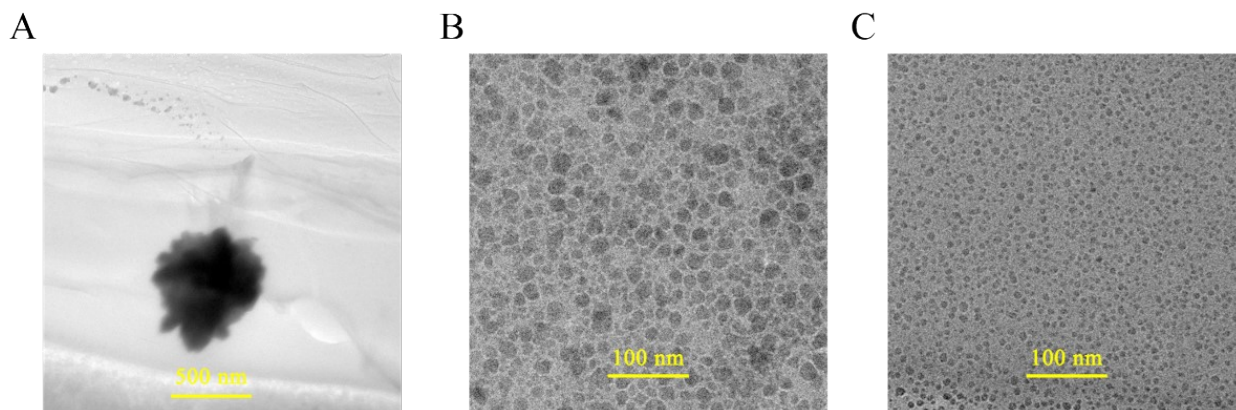

**Figure. S6** TEM image of AgNPs after interaction with (dA)<sub>11</sub>(A), (dA)<sub>22</sub>(B), and (dA)<sub>44</sub>(C).

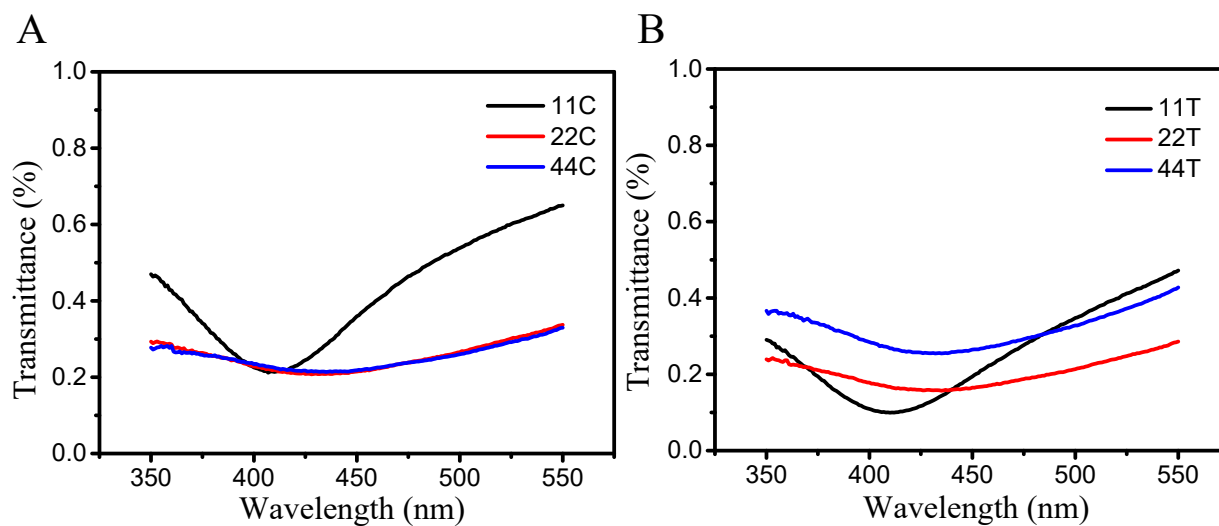

**Figure. S7** Transmittance curves of AgNPs solutions after interaction with cytosine nucleotide sequences(A) and thymine nucleotide sequences(B).

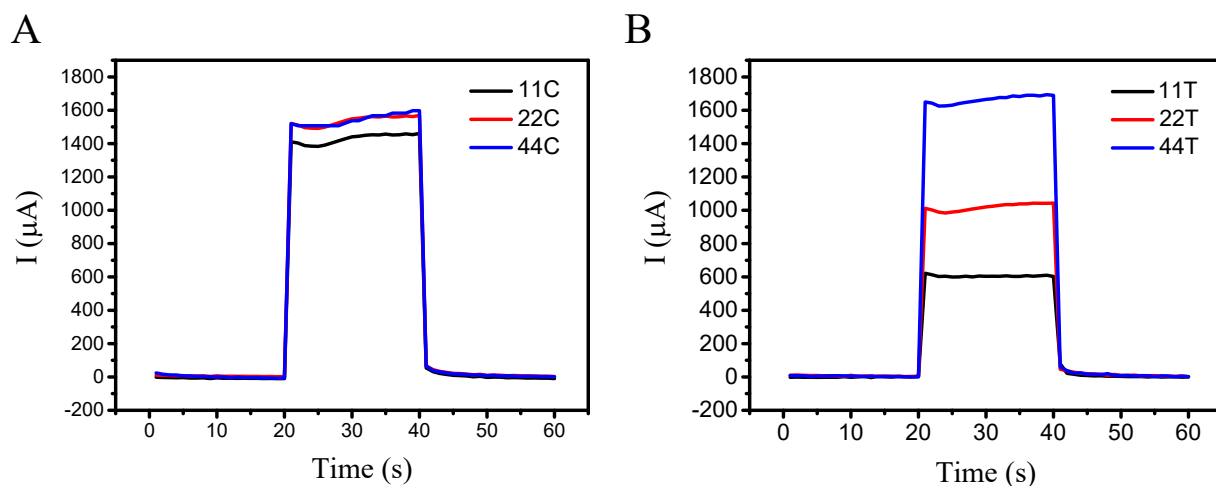

**Figure. S8** (A) PEC response of 11C/AgNPs solution, 22C/AgNPs solution, 44C/AgNPs solution. (B) PEC response of 11T/AgNPs solution, 22T/AgNPs solution, 44T/AgNPs solution.

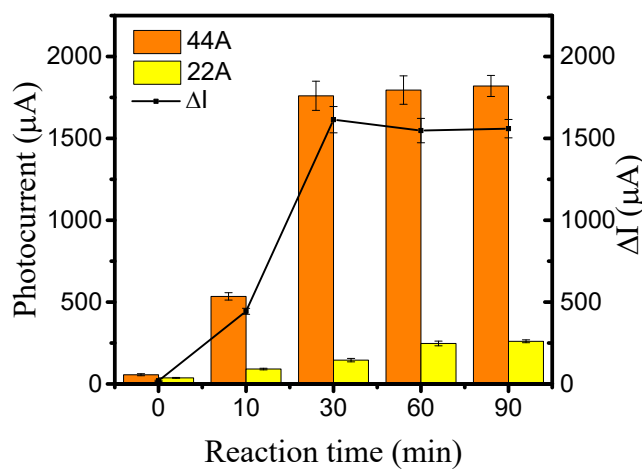

**Figure. S9** optimization of reaction time of the induction of AgNPs aggregation.

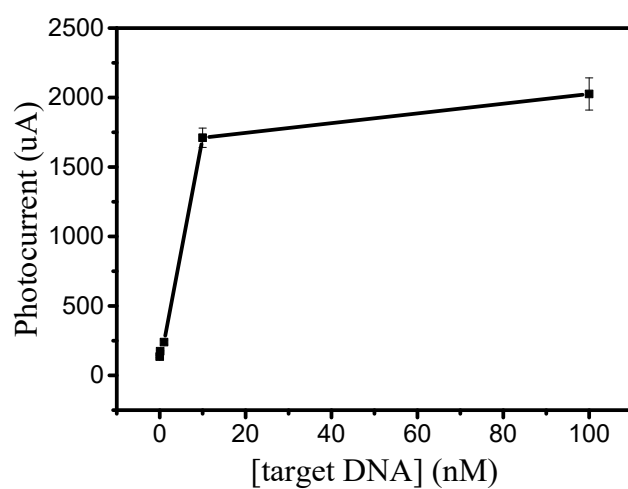

**Figure. S10** Photocurrent responses of the (dA)<sub>44</sub> probe after incubation with Cas12a/crRNA and 0-100 nM target DNA.

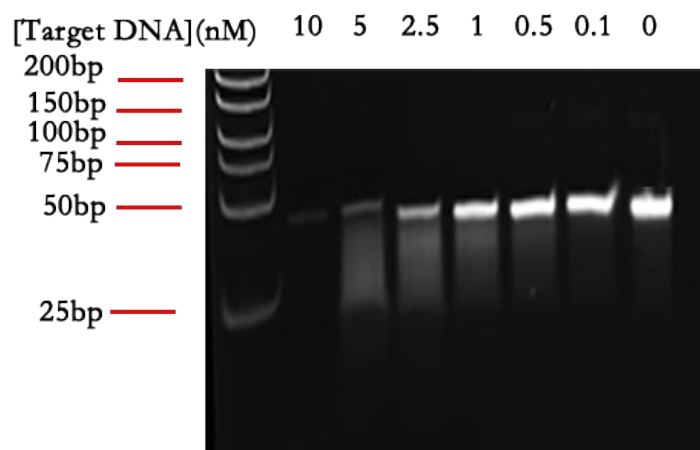

**Figure. S11** 12% polyacrylamide gel electrophoresis analysis of the (dA)<sub>44</sub> probe after incubation with Cas12a/crRNA and 0-10 nM target DNA.
